# Supplementary material for: Discriminating Different Bladder and Bladder Outlet Dysfunctions by Urinary Biomarkers in Women with Frequency–Urgency Syndrome
Source: MDPI journal article supplement (doi:10.3390/biomedicines11030673), 2023-02-23
Supplement: s1 [file s1]

**Table S1.** The AUC of the COV of urinary biomarkers in discriminating different OAB subgroups and controls.

| HSB vs.<br>Controls               | AUC   | COV            | Sensitivity | Specificity | PPV    | NPV    |
|-----------------------------------|-------|----------------|-------------|-------------|--------|--------|
| IL-1 $\beta$                      | 0.584 | $\geq 0.440$   | 85.2%       | 48.5%       | 57.5%  | 80%    |
| IL-2                              | 0.722 | $\leq 0.775$   | 89.3%       | 54.5%       | 62.5%  | 85.7%  |
| IL-6                              | 0.564 | $\geq 0.385$   | 100%        | 18.2%       | 50.9%  | 100%   |
| IL-8                              | 0.580 | $\geq 93.295$  | 21.4%       | 100%        | 100%   | 60%    |
| TNF- $\alpha$                     | 0.570 | $\geq 0.770$   | 55.6%       | 63.6%       | 55.6%  | 63.6%  |
| VEGF                              | 0.684 | $\leq 3.410$   | 46.4%       | 97.1%       | 92.9%  | 68.8%  |
| NGF                               | 0.659 | $\leq 0.245$   | 65.5%       | 61.8%       | 59.4%  | 67.7%  |
| BDNF                              | 0.519 | $\leq 0.415$   | 24.1%       | 100%        | 100%   | 60%    |
| PGE2                              | 0.581 | $\geq 180.605$ | 48.3%       | 75.8%       | 63.6%  | 62.5%  |
| 8-isoprostane                     | 0.612 | $\geq 22.610$  | 41.4%       | 81.8%       | 66.7%  | 61.4%  |
| TAC                               | 0.776 | $\leq 318.66$  | 58.6%       | 91.2%       | 85%    | 72.1%  |
| 8-OHdG                            | 0.517 | $\leq 14.775$  | 62.1%       | 58.8%       | 56.3%  | 64.5%  |
| <b>IDO + NDO +<br/>DV vs. HSB</b> |       |                |             |             |        |        |
| IL-1 $\beta$                      | 0.693 | $\geq 0.610$   | 66.4%       | 81.5%       | 93.8%  | 36.7%  |
| IL-2                              | 0.729 | $\leq 0.390$   | 55.6%       | 100.0%      | 100.0% | 35.0%  |
| IL-6                              | 0.510 | $\geq 1.650$   | 32.5%       | 85.7%       | 90.2%  | 23.8%  |
| IL-8                              | 0.546 | $\geq 1.860$   | 85.0%       | 32.1%       | 83.5%  | 34.6%  |
| TNF- $\alpha$                     | 0.742 | $\geq 1.035$   | 64.6%       | 88.9%       | 96.1%  | 37.5%  |
| VEGF                              | 0.547 | $\geq 3.235$   | 73.7%       | 46.4%       | 84.8%  | 30.2%  |
| NGF                               | 0.598 | $\leq 0.115$   | 28.4%       | 100.0%      | 100.0% | 25.9%  |
| BDNF                              | 0.549 | $\leq 0.310$   | 21.1%       | 100.0%      | 100.0% | 24.4%  |
| PGE2                              | 0.557 | $\geq 133.01$  | 72.8%       | 44.8%       | 83.8%  | 29.5%  |
| 8-isoprostane                     | 0.545 | $\leq 10.19$   | 37.9%       | 79.3%       | 88.0%  | 24.2%  |
| TAC                               | 0.681 | $\geq 316.32$  | 75.9%       | 58.6%       | 87.6%  | 38.6%  |
| 8-OHdG                            | 0.675 | $\geq 24.13$   | 57.8%       | 75.9%       | 90.5%  | 31.0%  |
| <b>IDO + NDO vs.<br/>DV</b>       |       |                |             |             |        |        |
| IL-1 $\beta$                      | 0.710 | $\leq 0.695$   | 69.6%       | 75.0%       | 81.4%  | 61.1%  |
| IL-2                              | 0.732 | $\geq 0.200$   | 76.4%       | 62.2%       | 76.4%  | 62.2%  |
| IL-6                              | 0.707 | $\geq 0.885$   | 66.2%       | 69.8%       | 78.3%  | 55.6%  |
| IL-8                              | 0.558 | $\geq 7.505$   | 56.5%       | 56.8%       | 67.2%  | 45.5%  |
| TNF- $\alpha$                     | 0.552 | $\geq 1.545$   | 45.7%       | 93.0%       | 91.4%  | 51.3%  |
| VEGF                              | 0.742 | $\geq 9.080$   | 61.4%       | 88.6%       | 89.6%  | 59.1%  |
| NGF                               | 0.619 | $\leq 0.125$   | 45.8%       | 100.0%      | 100.0% | 53.0%  |
| BDNF                              | 0.745 | $\leq 0.510$   | 65.2%       | 86.7%       | 88.2%  | 61.9%  |
| PGE2                              | 0.682 | $\geq 185.24$  | 67.1%       | 68.2%       | 77.0%  | 56.6%  |
| 8-isoprostane                     | 0.771 | $\geq 17.745$  | 61.1%       | 84.1%       | 86.3%  | 56.9%  |
| TAC                               | 0.541 | $\geq 1203.74$ | 27.5%       | 93.0%       | 86.4%  | 44.4%  |
| 8-OHdG                            | 0.578 | $\leq 23.59$   | 49.3%       | 71.1%       | 72.9%  | 47.1%  |
| <b>IDO vs. NDO</b>                |       |                |             |             |        |        |
| IL-1 $\beta$                      | 0.758 | $\leq 0.510$   | 58.1%       | 89.5%       | 81.8%  | 72.3%  |
| IL-2                              | 0.907 | $\geq 0.480$   | 100.0%      | 78.0%       | 77.5%  | 100%   |
| IL-6                              | 0.544 | $\leq 1.600$   | 74.2%       | 50.0%       | 53.5%  | 71.4%  |
| IL-8                              | 0.528 | $\geq 3.710$   | 87.1%       | 36.8%       | 52.9%  | 77.8%  |
| TNF- $\alpha$                     | 0.852 | $\leq 1.460$   | 90.3%       | 76.9%       | 75.7%  | 90.9%  |
| VEGF                              | 0.682 | $\geq 7.850$   | 90.3%       | 56.4%       | 62.2%  | 88%    |
| NGF                               | 0.894 | $\geq 0.130$   | 100.0%      | 80.5%       | 79.5%  | 100.0% |
| BDNF                              | 0.797 | $\geq 0.365$   | 100.0%      | 68.4%       | 72.1%  | 100.0% |

|                      |       |                |       |       |       |       |
|----------------------|-------|----------------|-------|-------|-------|-------|
| <b>PGE2</b>          | 0.662 | $\leq 626.195$ | 96.8% | 33.3% | 54%   | 92.9% |
| <b>8-isoprostane</b> | 0.511 | $\geq 7.115$   | 93.5% | 14.6% | 45.3% | 75.0% |
| <b>TAC</b>           | 0.789 | $\geq 642.62$  | 72.4% | 75.0% | 67.7% | 78.9% |
| <b>8-OHdG</b>        | 0.523 | $\leq 38.155$  | 77.4% | 35.0% | 48.0% | 66.7% |

Abbreviations: IDO: idiopathic detrusor overactivity; NDO: neurogenic detrusor overactivity; DV: dysfunctional voiding; HSB: hypersensitive bladder; IL: interleukin; TNF- $\alpha$ : tumor necrosis factor- $\alpha$ ; VEGF: vascular endothelial growth factor; NGF: nerve growth factor; BDNF: brain-derived neurotrophic factor; PGE2: prostaglandin E2; TAC: total antioxidant capacity; 8-OHdG: 8-hydroxydeoxyguanosine; AUC: area under the curve; COV: cut-off value; PPV: positive predictive value; NPV: negative predictive value.
